# Supplementary material
Source: PubMed Central journal article supplement (PMC6322044)
Supplement: AnnalsATS.201802-146OC_zachariah_data_supplement.pdf [file AnnalsATS.201802-146OC_zachariah_data_supplement.pdf]

## Online Data Supplement

### Culture-independent Analysis of Pediatric Broncho-alveolar Lavage (BAL) Specimens

Philip Zachariah MD MS, Chanelle Ryan BA, Sruti Nadimpalli MD MPH, Gina Coscia MD, Michelle Kolb, Hannah Smith, Marc Foca MD, Lisa Saiman MD MPH, Paul J. Planet MD PhD

#### Supplementary Table

**Table S1** Long-form of Table 4 with taxa expanded to show each OTU. All OTUs included in the top 5 OTUs are listed, organized by genus. Some genera, e.g. *Stenotrophomonas*, had multiple different OTUs with the same designation, with species or strain not identified. These had different OTU numbers so it is assumed that they are different species or strains.

\* The genus [*Prevotella*] belongs to the family *Paraprevotellaceae*.

† 21 different OTUs, detected in 61 samples, were not identified to genus level.

| OTU                              | Identified by routine culture |    |     |      | Not identified by routine culture |    |     |      |
|----------------------------------|-------------------------------|----|-----|------|-----------------------------------|----|-----|------|
|                                  | n samples                     |    |     | Mean | n samples                         |    |     | Mean |
|                                  | CF                            | IC | nIC |      | CF                                | IC | nIC |      |
| <i>Staphylococcus</i> sp.        | 18                            | 2  | 1   | 2127 | 4                                 | 14 | 16  | 1004 |
| <i>Staphylococcus sciuri</i>     | -                             | -  | -   | -    | 3                                 | 1  | 2   | 38   |
| <i>Streptococcus</i> sp.         | -                             | 3  | 1   | 653  | 12                                | 4  | 13  | 398  |
| <i>Streptococcus</i> sp.         | -                             | 2  | -   | 14   | -                                 | -  | -   | -    |
| <i>Streptococcus agalactiae</i>  | -                             | -  | -   | -    | -                                 | -  | 1   | 480  |
| <i>Streptococcus anginosus</i>   | -                             | -  | -   | -    | 1                                 | -  | -   | 91   |
| <i>Streptococcus</i> sp.         | -                             | -  | -   | -    | -                                 | -  | 1   | 1    |
| <i>Haemophilus</i> sp.           | 1                             | 1  | 4   | 2531 | 2                                 | 4  | 9   | 997  |
| <i>Stenotrophomonas</i> sp.      | 11                            | -  | 1   | 2815 | 3                                 | 1  | 2   | 205  |
| <i>Stenotrophomonas</i> sp.      | 4                             | -  | -   | 499  | 2                                 | -  | 1   | 81   |
| <i>Stenotrophomonas</i> sp.      | 6                             | -  | -   | 39   | -                                 | -  | -   | -    |
| <i>Stenotrophomonas</i> sp.      | 1                             | -  | -   | 6    | -                                 | -  | -   | -    |
| <i>Escherichia coli</i>          | -                             | 1  | -   | 892  | 5                                 | 6  | 7   | 213  |
| <i>Prevotella melaninogenca</i>  |                               |    |     |      | 4                                 | 2  | 1   | 485  |
| <i>Prevotella melaninogenica</i> |                               |    |     |      | 2                                 | -  | 1   | 90   |

|                                        |   |   |   |      |   |   |      |      |
|----------------------------------------|---|---|---|------|---|---|------|------|
| <i>Prevotella nanceiensis</i>          |   |   |   | 1    | 2 | - | 143  |      |
| <i>Prevotella sp.</i>                  |   |   |   | 1    | - | 1 | 127  |      |
| <i>Prevotella sp.</i>                  |   |   |   | -    | 1 | - | 422  |      |
| [ <i>Prevotella</i> ] sp. *            |   |   |   | -    | - | 3 | 600  |      |
| [ <i>Prevotella</i> ] sp. *            |   |   |   | 1    | - | - | 21   |      |
| <i>Neisseria subflava</i>              |   |   |   | 2    | 2 | 7 | 581  |      |
| <i>Neisseria cinerea</i>               |   |   |   | -    | - | 1 | 502  |      |
| <i>Actinobacillus parahaemolyticus</i> |   |   |   | 2    | 3 | 7 | 490  |      |
| <i>Veillonella dispar</i>              |   |   |   | 3    | 3 | 5 | 132  |      |
| <i>Veillonella dispar</i>              |   |   |   | 1    | - | - | 190  |      |
| <i>Pseudomonas sp.</i>                 | 4 | - | - | 1695 | 2 | 1 | 2    | 772  |
| <i>Enterococcus sp.</i>                |   |   |   | 2    | 1 | 5 | 261  |      |
| <i>Methylobacterium sp.</i>            |   |   |   | 2    | 5 | 1 | 240  |      |
| <i>Fusobacterium sp.</i>               |   |   |   | 1    | 3 | 2 | 505  |      |
| <i>Moraxella sp.</i>                   |   |   |   | 1    | 2 | 3 | 334  |      |
| <i>Brevibacillus sp.</i>               |   |   |   | 1    | 4 | 1 | 138  |      |
| <i>Sphingomonas sp.</i>                |   |   |   | 2    | 4 | - | 111  |      |
| <i>Acinetobacter rhizosphaerae</i>     |   |   |   | -    | 2 | 1 | 1286 |      |
| <i>Acinetobacter sp.</i>               |   |   |   | 1    | - | 1 | 70   |      |
| <i>Delftia sp.</i>                     | - | - | 1 | 851  | 1 | 1 | 2    | 775  |
| <i>Corynebacterium sp.</i>             |   |   |   | -    | 2 | 1 | 974  |      |
| <i>Corynebacterium sp.</i>             |   |   |   | 1    | - | - | 1    |      |
| <i>Corynebacterium sp.</i>             |   |   |   | -    | 1 | - | 1    |      |
| <i>Rothia mucilaginosa</i>             |   |   |   | 4    | - | 1 | 89   |      |
| <i>Granulicatella sp.</i>              |   |   |   | 2    | - | 2 | 731  |      |
| <i>Capnocytophaga ochracea</i>         |   |   |   | -    | 1 | 1 | 339  |      |
| <i>Capnocytophaga sp.</i>              |   |   |   | -    | - | 2 | 148  |      |
| <i>Achromobacter sp.</i>               | 1 | - | 1 | 2049 | - | - | 1    | 1275 |
| <i>Parvimonas sp.</i>                  |   |   |   | 1    | 2 | - | 636  |      |
| <i>Parvimonas sp.</i>                  |   |   |   | 1    | - | - | 303  |      |
| <i>Pantoea agglomerans</i>             |   |   |   | -    | - | 2 | 1962 |      |
| <i>Legionella sp.</i>                  |   |   |   | 1    | 1 | - | 403  |      |
| <i>Porphyromonas endodontalis</i>      |   |   |   | -    | - | 1 | 560  |      |
| <i>Porphyromonas sp.</i>               |   |   |   | 1    | - | - | 63   |      |
| <i>Campylobacter sp.</i>               |   |   |   | -    | 1 | 1 | 293  |      |
| <i>Aggregatibacter sp.</i>             |   |   |   | -    | 1 | 1 | 261  |      |
| WAL_1855D                              |   |   |   | 2    | - | - | 219  |      |
| <i>Meiothermus sp.</i>                 |   |   |   | -    | 2 | - | 129  |      |
| <i>Leptotrichia sp.</i>                |   |   |   | -    | - | 1 | 127  |      |
| <i>Leptotrichia sp.</i>                |   |   |   | 1    | - | - | 1    |      |
| <i>Proteus sp.</i>                     | 1 | - | - | 2338 | - | - | 1    | 38   |
| <i>Nocardia sp.</i>                    | - | 1 | - | 936  | - | - | -    | -    |

|                              |  |  |    |    |    |      |
|------------------------------|--|--|----|----|----|------|
| <i>Nocardia</i> sp.          |  |  | 1  | -  | -  | 22   |
| <i>Chryseobacterium</i> sp.  |  |  | -  | -  | 1  | 2126 |
| <i>Bacteroides</i> sp.       |  |  | -  | -  | 1  | 1163 |
| <i>Abiotrophia</i> sp.       |  |  | -  | -  | 1  | 397  |
| <i>Mycoplasma</i> sp.        |  |  | -  | -  | 1  | 365  |
| <i>Dialister</i> sp.         |  |  | -  | -  | 1  | 232  |
| <i>Lautropia</i> sp.         |  |  | -  | -  | 1  | 152  |
| <i>Jeotgalicoccus</i> sp.    |  |  | -  | 1  | -  | 93   |
| <i>Janthinobacterium</i> sp. |  |  | -  | 1  | -  | 88   |
| <i>Sporosarcina</i> sp.      |  |  | -  | -  | 1  | 75   |
| <i>Paracoccus</i> sp.        |  |  | -  | 1  | -  | 63   |
| <i>Geobacillus</i> sp.       |  |  | -  | 1  | -  | 52   |
| <i>Bacillus endophyticus</i> |  |  | -  | -  | 1  | 46   |
| <i>Cloacibacterium</i> sp.   |  |  | 1  | -  | -  | 26   |
| <i>Enterobacter</i> sp.      |  |  | -  | -  | 1  | 14   |
| <i>Serratia marcescens</i>   |  |  | -  | 1  | -  | 7    |
| <i>Sphingobium</i> sp.       |  |  | 1  | -  | -  | 1    |
| <i>Devosia</i> sp.           |  |  | 1  | -  | -  | 1    |
| <i>Bradyrhizobium</i> sp.    |  |  | 1  | -  | -  | 1    |
| <i>Finegoldia</i> sp.        |  |  | 1  | -  | -  | 1    |
| unidentified †               |  |  | 20 | 21 | 20 | 331  |

## Supplementary Figure Legends

**Figure S1. (A)** Genus abundance, by OTU read count, in each diagnostic group. Following multivariate analysis, relative abundance of *Corynebacterium* and *Escherichia* are significantly lower in the CF group compared to the nIC group ( $p=0.03$  and  $0.001$ , respectively). **(B)** Genus abundance separated by use of treatment antibiotics. Following multivariate analysis, relative abundance of the genera shown are significantly lower ( $p<0.05$ ) in the samples exposed to treatment antibiotics within 7 days of sampling.

**Figure S2. (A)** Pearson correlation analysis of correlation of OTU abundance with prevalence. In all diagnosis groups, abundance is positively correlated with prevalence, with significant Pearson correlation coefficients with  $r$  values of  $0.55-0.62$  ( $p<0.0001$  in all diagnoses). **(B)** Defining core taxa: 30% and 50% prevalence are marked with dashed lines. The 2.5% and 97.5% confidence limits of a chi-squared distribution are marked. OTUs falling outside of these limits are non-randomly dispersed. Dots representing non-randomly dispersed OTUs present in  $\geq 30\%$  but  $< 50\%$  of samples are solid grey, and open circles represent OTUs present in  $\geq 50\%$  of samples. Black dots are not included in any core.

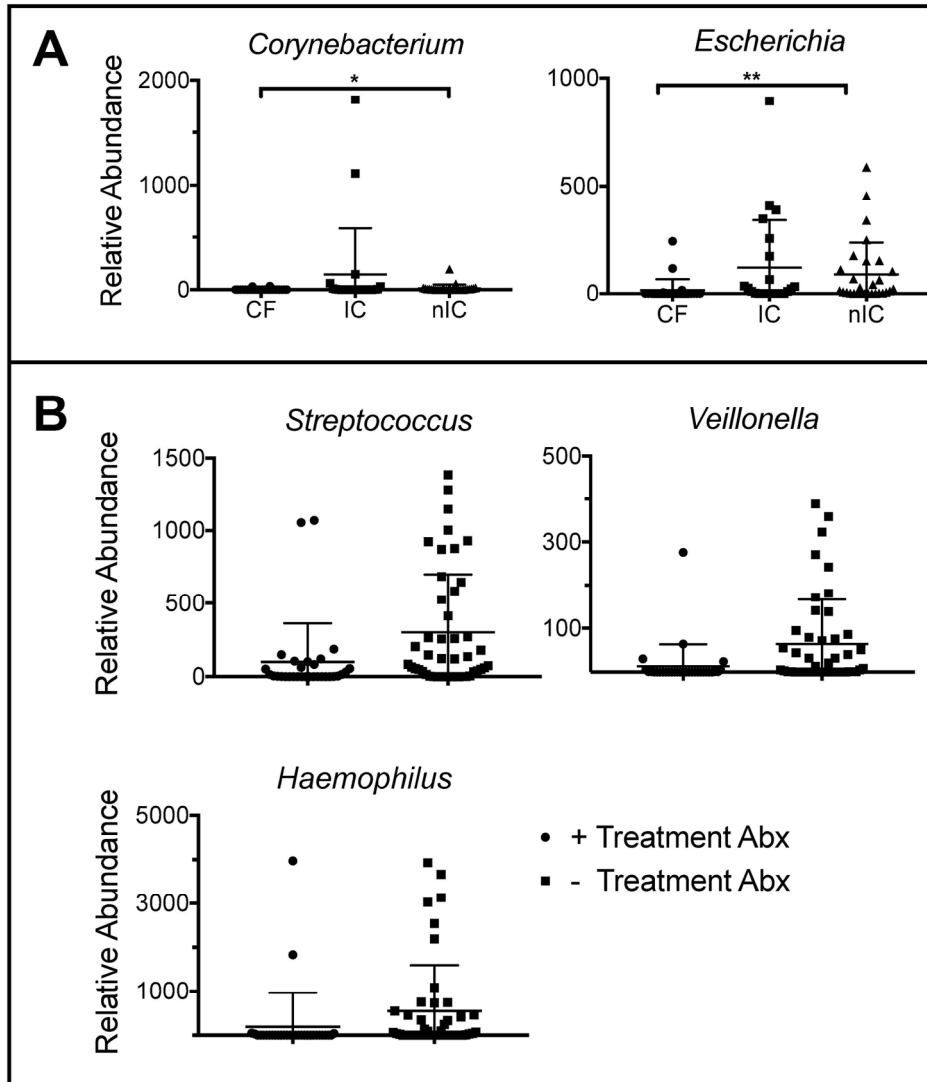

Figure S1. (A) Genus abundance, by OTU read count, in each diagnostic group. Following multivariate analysis, relative abundance of *Corynebacterium* and *Escherichia* are significantly lower in the CF group compared to the nIC group ( $p=0.03$  and  $0.001$ , respectively). (B) Genus abundance separated by use of treatment antibiotics. Following multivariate analysis, relative abundance of the genera shown are significantly lower ( $p<0.05$ ) in the samples exposed to treatment antibiotics within 7 days of sampling.

155x169mm (300 x 300 DPI)

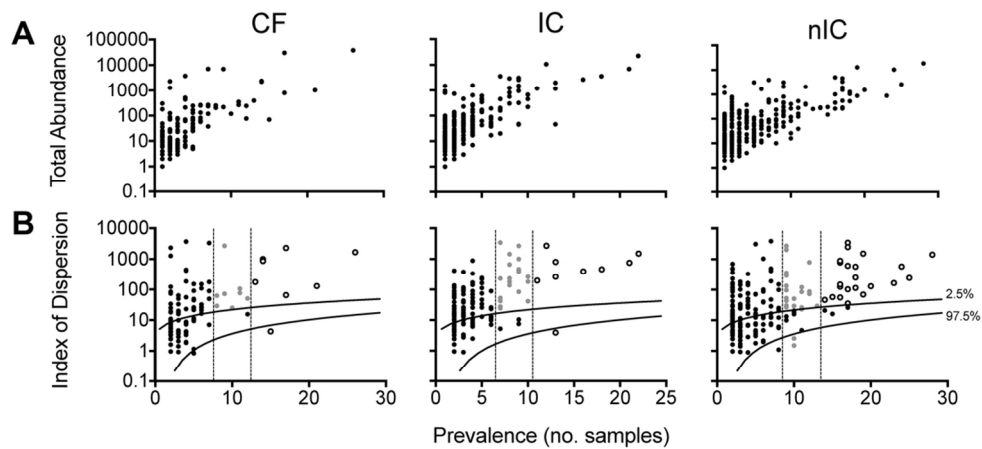

Figure S2. (A) Pearson correlation analysis of correlation of OTU abundance with prevalence. In all diagnosis groups, abundance is positively correlated with prevalence, with significant Pearson correlation coefficients with  $r$  values of 0.55-0.62 ( $p < 0.0001$  in all diagnoses). (B) Defining core taxa: 30% and 50% prevalence are marked with dashed lines. The 2.5% and 97.5% confidence limits of a chi-squared distribution are marked. OTUs falling outside of these limits are non-randomly dispersed. Dots representing non-randomly dispersed OTUs present in  $\geq 30\%$  but  $< 50\%$  of samples are solid grey, and open circles represent OTUs present in  $\geq 50\%$  of samples. Black dots are not included in any core.

103x48mm (300 x 300 DPI)
